# Supplementary material
Source: PubMed Central journal article supplement (PMC8454028)

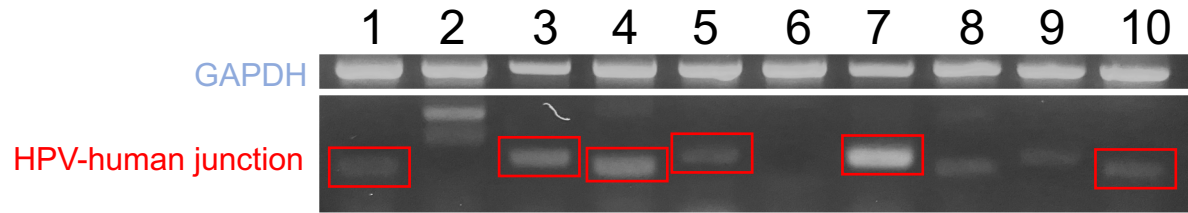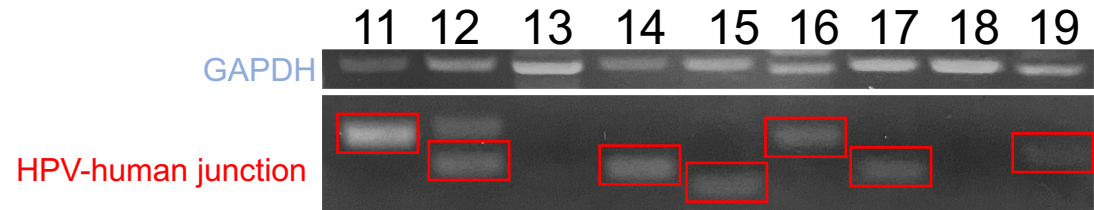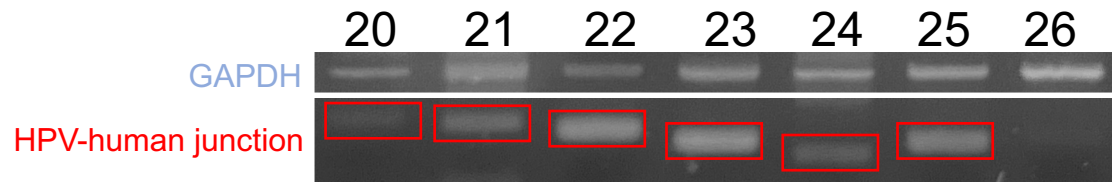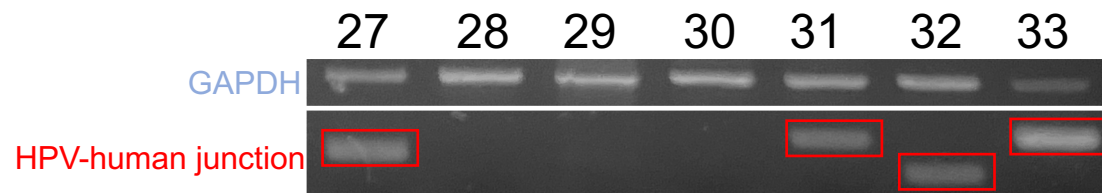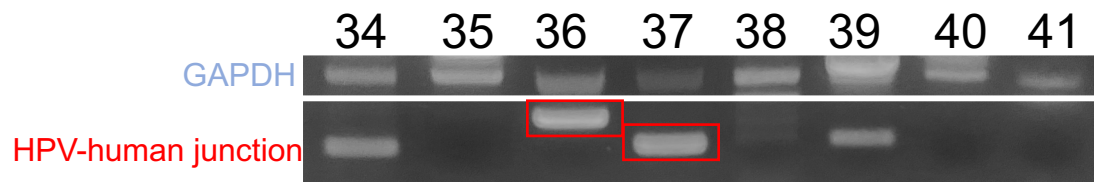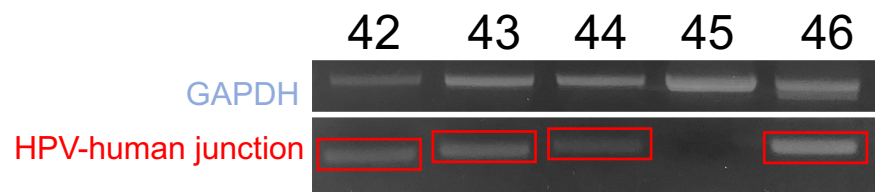

Figure S1

Supplement: NIHMS1706532-supplement-Supp_Figure_S1.pdf [file NIHMS1706532-supplement-Supp_Figure_S1.pdf]

**A.****UM-SCC-47**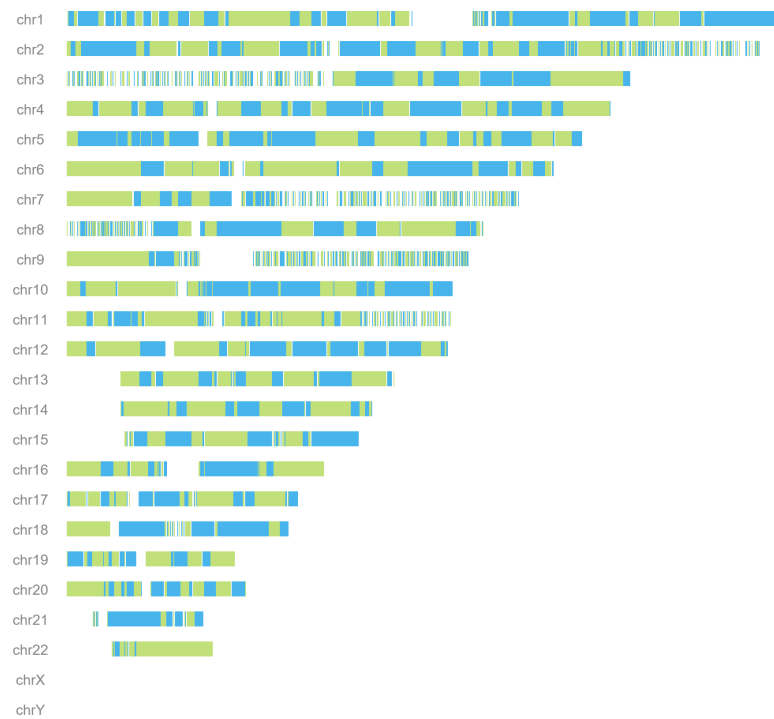**B.****PDX-294R**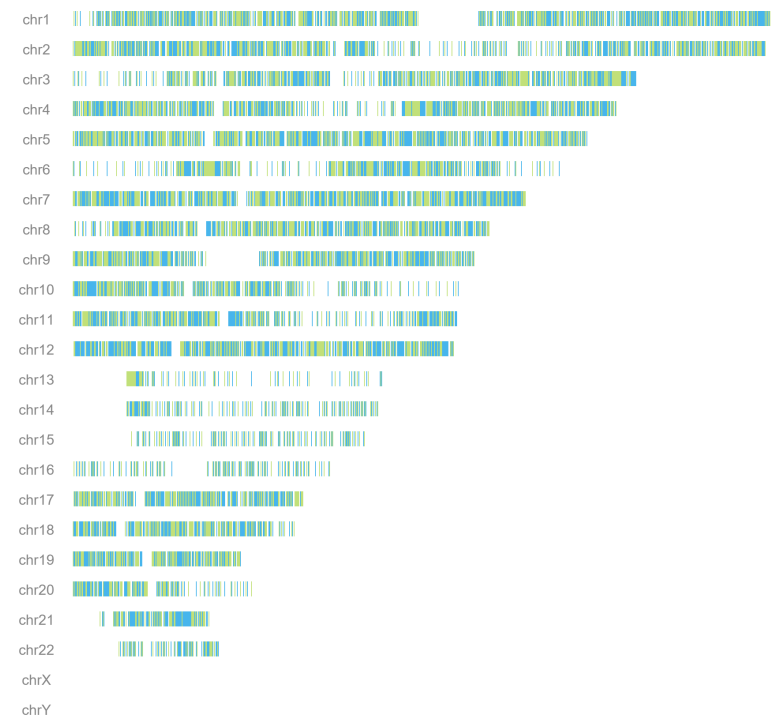**C.****Tumor-A**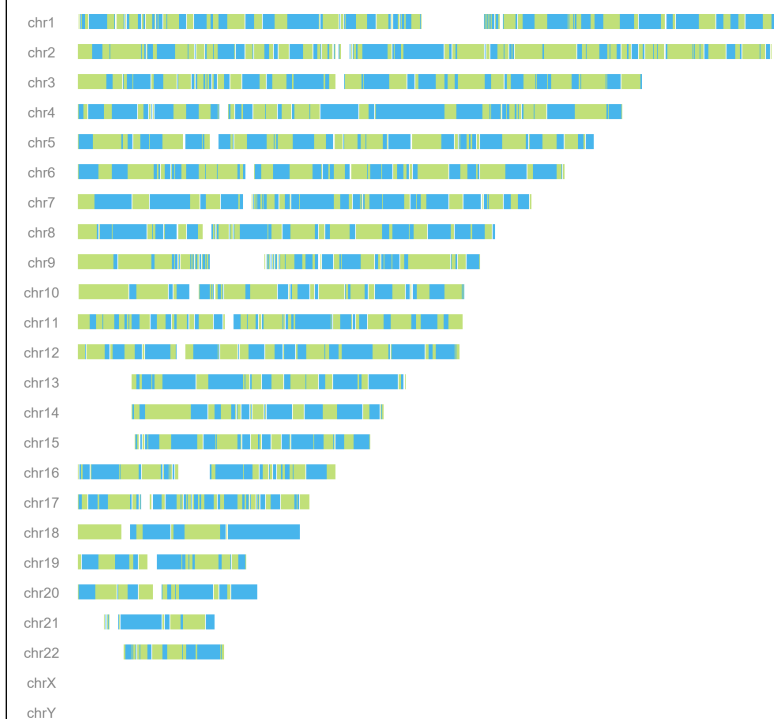

Figure S2

Supplement: NIHMS1706532-supplement-Supp_Figure_S2.pdf [file NIHMS1706532-supplement-Supp_Figure_S2.pdf]

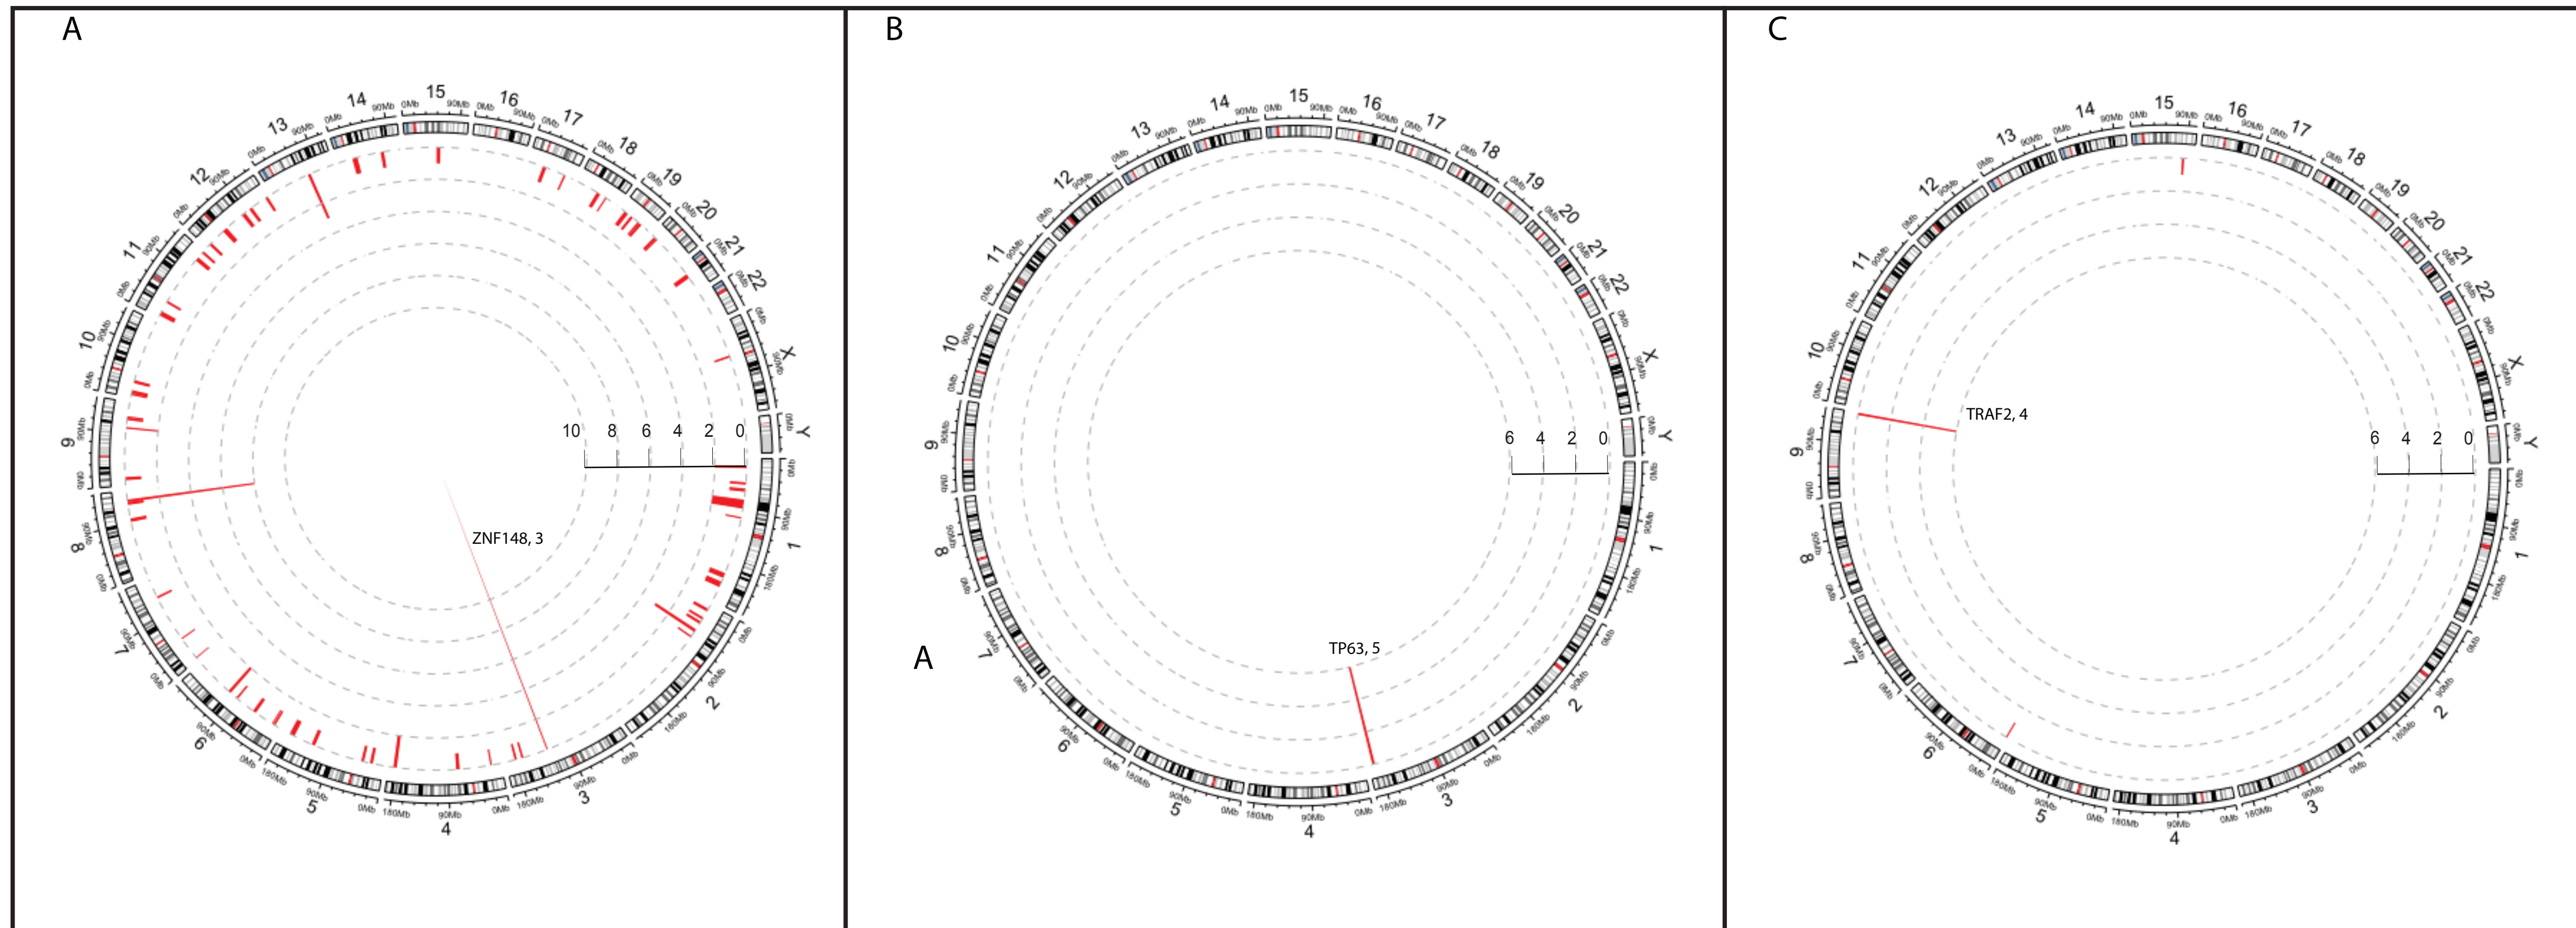

**Figure S3**

Supplement: NIHMS1706532-supplement-Supp_Figure_S3.pdf [file NIHMS1706532-supplement-Supp_Figure_S3.pdf]
